# Supplementary material for: Detection of coffee leaf disease and identification using deep learning
Source: PeerJ journal article supplement (doi:10.7717/peerj-cs.3172), 2025-10-07
Supplement: TableS2.docx [file TableS2.docx]

| **Classes**  **Name** | | **Classifier Types** | | | | | | | | | | | | | | |
| --- | --- | --- | --- | --- | --- | --- | --- | --- | --- | --- | --- | --- | --- | --- | --- | --- |
| **CNN 1** | | | | | **CNN1 & SVM** | | | | | **CNN1&RF** | | | | |
| Predicted Class | | | | | Predicted Class | | | | | Predicted Class | | | | |
| Actual Class | Class1 | 1325 | 0 | 0 | 0 | 0 | 1325 | 0 | 0 | 0 | 0 | 1325 | 0 | 0 | 0 | 0 |
| Class2 | 0 | 1297 | 0 | 0 | 0 | 0 | 1428 | 0 | 0 | 0 | 0 | 1297 | 0 | 0 | 0 |
| Class3 | 2 | 0 | 1305 | 0 | 0 | 2 | 0 | 1305 | 0 | 0 | 0 | 0 | 1305 | 2 | 0 |
| Class4 | 1 | 0 | 0 | 1297 | 1 | 1 | 0 | 0 | 1297 | 1 | 8 | 0 | 2 | 128 | 9 |
| Class5 | 5 | 0 | 12 | 1 | 1325 | 5 | 50 | 12 | 1 | 1222 | 0 | 0 | 3 | 2 | 1338 |
| **Classes**  **Name** | | **CNN 2** | | | | | **CNN2 & SVM** | | | | | **CNN 2&RF** | | | | |
| Predicted Class | | | | | Predicted Class | | | | | Predicted Class | | | | |
| Actual Class | Class 1 | 1325 | 0 | 0 | 0 | 0 | 1325 | 0 | 0 | 0 | 0 | 1225 | 0 | 0 | 0 | 0 |
| Class 2 | 0 | 1297 | 0 | 0 | 0 | 0 | 1297 | 0 | 0 | 0 | 0 | 1297 | 0 | 0 | 0 |
| Class 3 | 2 | 0 | 1305 | 0 | 0 | 2 | 0 | 1305 | 0 | 0 | 0 | 0 | 1305 | 2 | 0 |
| Class 4 | 27 | 0 | 5 | 1223 | 44 | 27 | 0 | 5 | 1223 | 44 | 8 | 0 | 2 | 1280 | 9 |
| Class 5 | 11 | 0 | 0 | 1 | 1331 | 11 | 0 | 0 | 1 | 1331 | 0 | 0 | 3 | 2 | 1338 |
| **Classes**  **Name** | | **VGG16** | | | | | **VGG16 & SNM** | | | | | **VGG16 & RF** | | | | |
| Predicted Class | | | | | Predicted Class | | | | | Predicted Class | | | | |
| Actual Class | Class 1 | 1325 | 0 | 0 | 0 | 0 | 1325 | 0 | 0 | 0 | 0 | 1325 | 0 | 0 | 0 | 0 |
| Class 2 | 0 | 1428 | 0 | 0 | 0 | 0 | 1428 | 0 | 0 | 0 | 0 | 1297 | 0 | 0 | 0 |
| Class 3 | 2 | 0 | 1305 | 0 | 0 | 2 | 0 | 1305 | 0 | 0 | 0 | 0 | 1300 | 4 | 3 |
| Class 4 | 1 | 0 | 0 | 1297 | 1 | 1 | 0 | 0 | 1297 | 1 | 7 | 0 | 1 | 1283 | 8 |
| Class 5 | 5 | 50 | 12 | 1 | 1222 | 5 | 50 | 12 | 1 | 1222 | 5 | 0 | 1 | 1 | 1336 |
|  | | **RESNT 50** | | | | | **Effıvıntnet** | | | | |  | | | | |
| Predicted Class | | | | | Predicted Class | | | | |  | | | | |
| Actual Class | Class 1 | 1325 | 0 | 0 | 0 | 0 | 1304 | 0 | 0 | 0 | 21 |  |  |  |  |  |
| Class 2 | 0 | 1297 | 0 | 0 | 0 | 0 | 1297 | 0 | 0 | 0 |  |  |  |  |  |
| Class 3 | 6 | 0 | 1301 | 0 | 0 | 22 | 0 | 1282 | 0 | 3 |  |  |  |  |  |
| Class 4 | 9 | 0 | 0 | 1266 | 24 | 70 | 0 | 0 | 1092 | 137 |  |  |  |  |  |
| Class 5 | 10 | 0 | 0 | 3 | 1330 | 19 | 0 | 0 | 10 | 1314 |  |  |  |  |  |
